# Supplementary material for: Analytical validation of a standardized scoring protocol for Ki67: phase 3 of an international multicenter collaboration
Source: PubMed Central journal article supplement (PMC5515324; doi:10.1038/npjbcancer.2016.14), 2016-05-18
Supplement: npjbcancer201614-s4.pdf [file npjbcancer201614-s4.pdf]

# Analytical validation of a standardized scoring protocol for Ki67: phase 3 of an international multicenter collaboration.

*Supplemental document: exploratory examination of scoring fields*

- **Hypothesis:** detail examination of scoring fields may reveal potential sources of variability that could help explain the observed discrepancies in Ki67 scores
- **Method:** select and examine scoring fields of cases where labs gave fairly discrepant scores
- **Results:** five sources of variability were identified
  1. counting of ductal carcinoma in situ (DCIS)
  2. counting of stromal cells
  3. positive nuclei localized within a part of the scoring field
  4. labs measuring higher or lower than others tended to do so relatively consistently – labs may need recalibration?
  5. hot-spot score discrepancy seems to be driven (partly) by field selection

# 1. Counting of DCIS

- TB250 (hot-spot scores)
- Lab T gave significantly higher Ki67 score (42%) compared to other labs (*group 3 median: 19%*)
- It appears that DCIS may have been scored. Examination of the corresponding p63 image supported this view (*please refer to the next slide*).

| (median score)  | GROUP 1 |    |    |    |    |    |    |    |    | GROUP 2 |    | GROUP 3 |    |    |    |    |    |    |    |    |    |    |         |
|-----------------|---------|----|----|----|----|----|----|----|----|---------|----|---------|----|----|----|----|----|----|----|----|----|----|---------|
| Specimen number | A       | I  | C  | E  | G  | B  | F  | J  | D  | H       | L  | K       | R  | O  | P  | V  | U  | Q  | S  | N  | M  | T  |         |
| TB196 (7)       | 4       | 9  | 8  | 7  | 6  | 7  | 11 | 11 | 4  | 15      | 5  | 16      | 3  | 10 | 7  | 17 | 5  | 14 | 3  | 4  | 6  | 28 | 15:6:1  |
| TB040 (8)       | 7       | 7  | 8  | 12 | 7  | 9  | 5  | 8  | 2  | 15      | 13 | 9       | 6  | 10 | 10 | 6  | 8  | 5  | 11 | 5  | 11 | 14 | 14:8:0  |
| TB374 (8)       | 2       | 8  | 7  | 7  | 9  | 7  | 7  | 12 | 6  | 19      | 11 | 12      | 4  | 7  | 8  | 9  | 10 | 10 | 10 | 3  | 6  | 18 | 15:7:0  |
| TB083 (10)      | 6       | 4  | 10 | 11 | 12 | 6  | 12 | 16 | 5  | 11      | 13 | 9       | 10 | 8  | 11 | 7  | 6  | 10 | 11 | 6  | 10 | 31 | 10:11:1 |
| TB107 (11)      | 7       | 5  | 13 | 10 | 8  | 9  | 6  | 12 | 9  | 15      | 17 | 15      | 10 | 12 | 11 | 11 | 11 | 16 | 12 | 8  | 14 | 28 | 7:14:1  |
| TB016 (12)      | 9       | 8  | 13 | 14 | 10 | 12 | 11 | 12 | 11 | 13      | 15 | 14      | 6  | 12 | 13 | 18 | 6  | 9  | 11 | 10 | 11 | 30 | 5:16:1  |
| TB113 (12)      | 9       | 13 | 15 | 18 | 9  | 11 | 19 | 11 | 18 | 26      | 16 | 11      | 12 | 7  | 6  | 7  | 8  | 13 | 13 | 8  | 15 | 27 | 7:13:2  |
| TB634 (15)      | 9       | 16 | 18 | 20 | 19 | 20 | 14 | 20 | 22 | 30      | 14 | 17      | 13 | 13 | 11 | 15 | 12 | 13 | 14 | 15 | 15 | 28 | 1:17:4  |
| TB193 (18)      | 10      | 14 | 18 | 21 | 24 | 18 | 15 | 19 | 22 | 32      | 20 | 23      | 11 | 16 | 15 | 16 | 14 | 19 | 15 | 19 | 21 | 33 | 0:14:8  |
| TB036 (19)      | 15      | 14 | 19 | 22 | 21 | 17 | 19 | 20 | 21 | 29      | 21 | 23      | 14 | 13 | 14 | 15 | 9  | 15 | 20 | 15 | 23 | 24 | 1:13:8  |
| TB112 (20)      | 21      | 19 | 15 | 29 | 14 | 28 | 21 | 18 | 33 | 38      | 15 | 18      | 25 | 20 | 20 | 18 | 13 | 16 | 17 | 14 | 28 | 27 | 0:11:11 |
| TB250 (21)      | 6       | 21 | 26 | 24 | 26 | 22 | 21 | 23 | 26 | 33      | 21 | 26      | 8  | 19 | 21 | 20 | 25 | 19 | 19 | 16 | 18 | 42 | 1:6:14  |
| TB286 (26)      | 14      | 20 | 23 | 29 | 29 | 26 | 25 | 26 | 31 | 38      | 22 | 31      | 23 | 13 | 28 | 25 | 29 | 26 | 25 | 84 | 23 | 22 | 0:2:20  |
| TB192 (27)      | 18      | 15 | 23 | 28 | 28 | 40 | 21 | 41 | 27 | 39      | 38 | 32      | 19 | 25 | 22 | 23 | 25 | 28 | 28 | 18 | 30 | 44 | 0:4:18  |
| TB082 (29)      | 15      | 25 | 28 | 27 | 27 | 20 | 35 | 32 | 27 | 31      | 32 | 36      | 22 | 27 | 23 | 29 | 21 | 35 | 32 | 31 | 41 | 51 | 0:2:20  |
| TB033 (31)      | 19      | 18 | 21 | 30 | 30 | 29 | 34 | 32 | 34 | 37      | 34 | 39      | 31 | 32 | 30 | 31 | 33 | 31 | 26 | 30 | 40 | 42 | 0:2:20  |
| TB090 (33)      | 23      | 28 | 31 | 36 | 37 | 34 | 33 | 38 | 29 | 50      | 41 | 40      | 31 | 24 | 22 | 32 | 26 | 25 | 34 | 27 | 37 | 49 | 0:0:22  |
| TB468 (34)      | 21      | 28 | 32 | 35 | 37 | 46 | 31 | 30 | 53 | 51      | 38 | 43      | 33 | 43 | 43 | 26 | 30 | 31 | 33 | 33 | 37 | 43 | 0:0:22  |
| TB022 (34)      | 22      | 30 | 36 | 32 | 34 | 31 | 32 | 36 | 35 | 37      | 43 | 40      | 23 | 30 | 35 | 24 | 38 | 31 | 34 | 30 | 49 | 51 | 0:0:22  |
| TB105 (37)      | 31      | 33 | 40 | 48 | 41 | 37 | 38 | 44 | 43 | 47      | 38 | 39      | 28 | 37 | 27 | 36 | 39 | 34 | 32 | 35 | 32 | 46 | 0:0:22  |
| TB067 (41)      | 30      | 27 | 43 | 42 | 45 | 37 | 40 | 44 | 37 | 46      | 41 | 44      | 45 | 23 | 36 | 29 | 38 | 38 | 36 | 45 | 56 | 42 | 0:0:22  |
| TB203 (42)      | 27      | 42 | 44 | 52 | 52 | 58 | 47 | 49 | 51 | 54      | 39 | 52      | 39 | 33 | 30 | 28 | 40 | 35 | 38 | 41 | 43 | 44 | 0:0:22  |
| TB310 (45)      | 29      | 44 | 47 | 49 | 56 | 44 | 44 | 50 | 55 | 54      | 44 | 50      | 43 | 45 | 37 | 37 | 44 | 44 | 41 | 85 | 51 | 61 | 0:0:22  |
| TB405 (47)      | 36      | 36 | 47 | 37 | 32 | 51 | 30 | 50 | 53 | 55      | 47 | 45      | 32 | 41 | 44 | 47 | 46 | 51 | 35 | 82 | 54 | 59 | 0:0:22  |
| TB381 (50)      | 20      | 50 | 36 | 66 | 63 | 49 | 61 | 50 | 46 | 65      | 51 | 49      | 45 | 54 | 51 | 41 | 33 | 46 | 47 | 85 | 49 | 59 | 0:1:21  |
| TB319 (55)      | 47      | 55 | 54 | 68 | 65 | 60 | 58 | 59 | 55 | 66      | 47 | 54      | 53 | 52 | 49 | 52 | 57 | 56 | 50 | 81 | 70 | 47 | 0:0:22  |
| TB077 (61)      | 47      | 50 | 60 | 58 | 72 | 60 | 67 | 57 | 63 | 70      | 43 | 55      | 65 | 58 | 63 | 61 | 71 | 57 | 67 | 62 | 74 | 69 | 0:0:22  |
| TB633 (62)      | 62      | 54 | 65 | 70 | 65 | 61 | 66 | 71 | 70 | 72      | 58 | 61      | 48 | 58 | 61 | 56 | 57 | 53 | 61 | 84 | 64 | 73 | 0:0:22  |
| TB245 (76)      | 73      | 71 | 85 | 71 | 89 | 82 | 86 | 75 | 87 | 73      | 65 | 77      | 76 | 70 | 76 | 69 | 86 | 66 | 85 | 83 | 90 | 75 | 0:0:22  |
| TB460 (93)      | 95      | 94 | 93 | 98 | 99 | 98 | 99 | 90 | 98 | 91      | 84 | 93      | 88 | 87 | 91 | 91 | 94 | 93 | 91 | 91 | 95 | 86 | 0:0:22  |

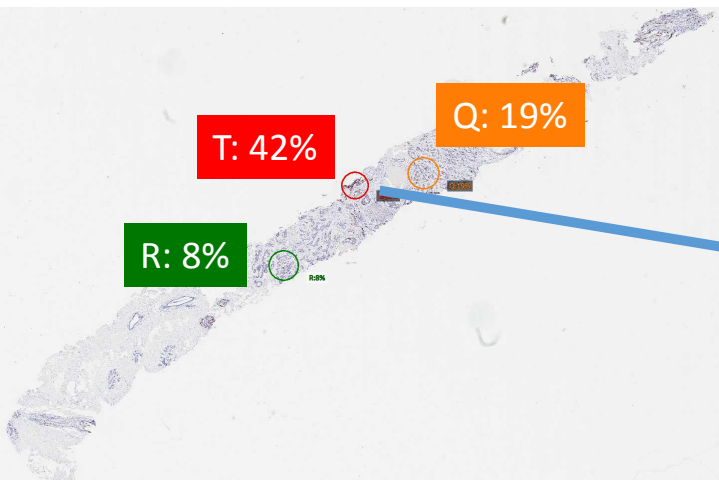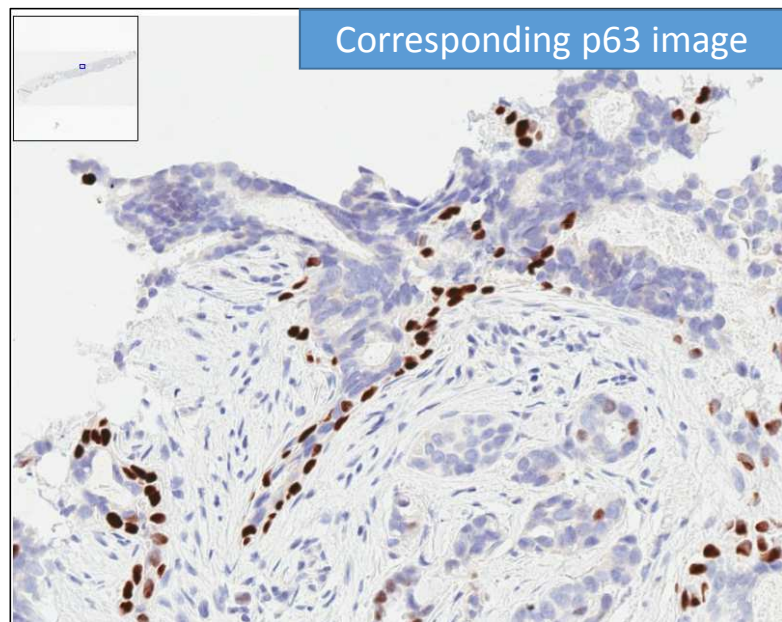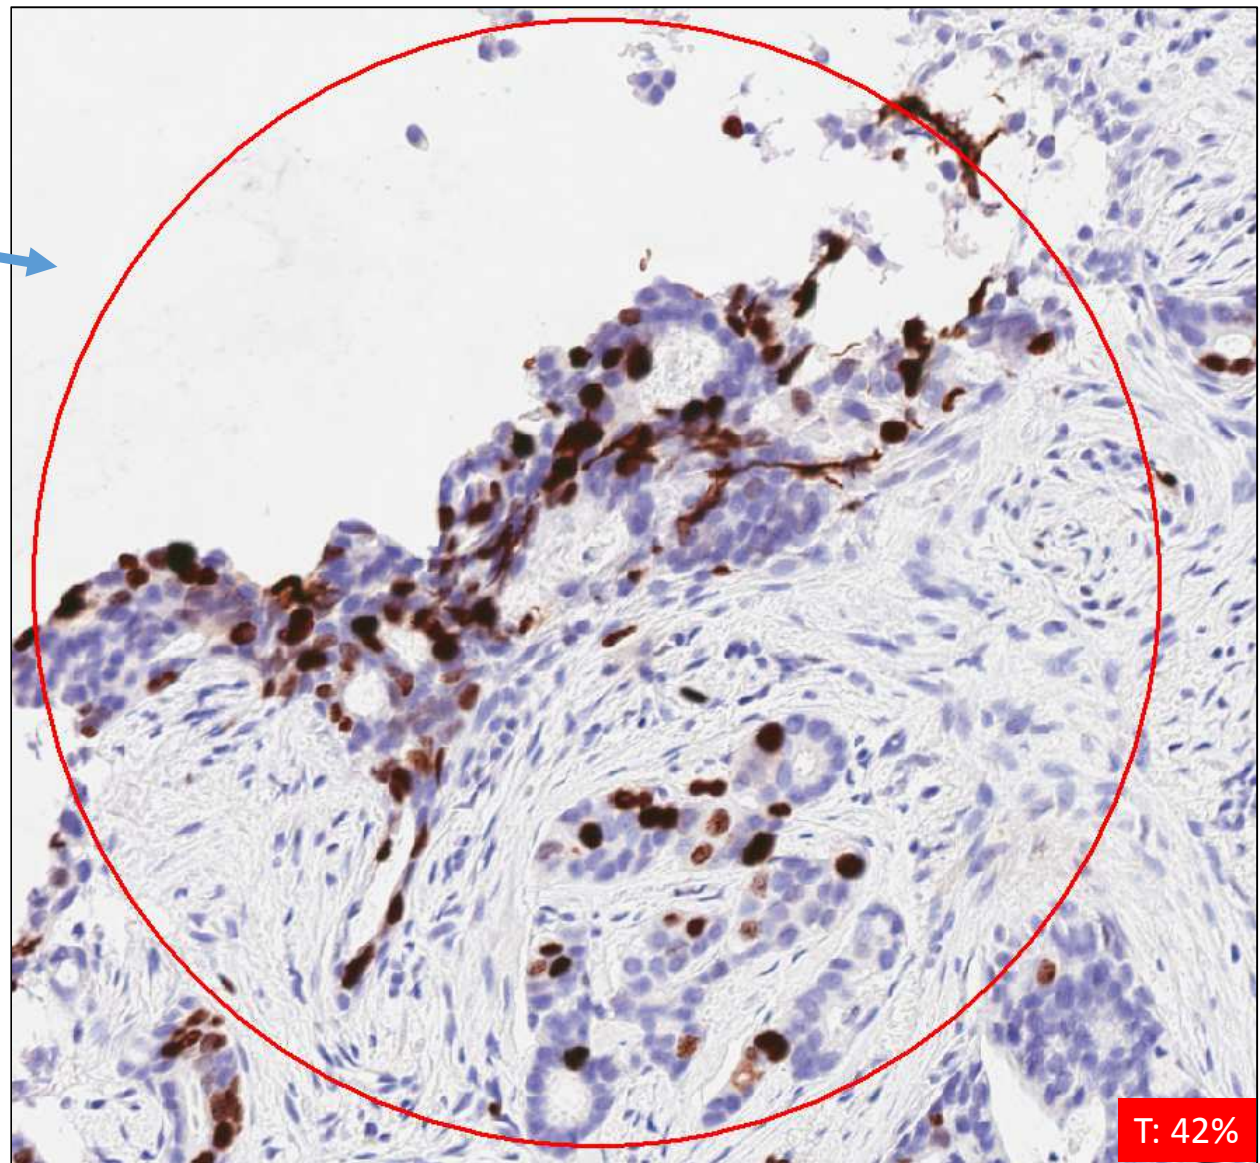

## 2. Counting of stromal cells

- TB196 (hot-spot scores)
- Lab T gave significantly higher Ki67 score (28%) compared to other labs (*group 3 median: 7%*)
- It seems that some of the stromal cells have been scored, contributing to the higher count (*please refer to the next slide*).

| Specimen number | (median score) |    |    |    |    |    |    |    |    |    | GROUP 2 |    | GROUP 3 |    |    |    |    |    |    |    |    |    |         |
|-----------------|----------------|----|----|----|----|----|----|----|----|----|---------|----|---------|----|----|----|----|----|----|----|----|----|---------|
|                 | A              | I  | C  | E  | G  | B  | F  | J  | D  | H  | L       | K  | R       | O  | P  | V  | U  | Q  | S  | N  | M  | T  |         |
| TB196 (7)       | 4              | 9  | 8  | 7  | 6  | 7  | 11 | 11 | 4  | 15 | 5       | 16 | 3       | 10 | 7  | 17 | 5  | 14 | 3  | 4  | 6  | 28 | 15:6:1  |
| TB040 (8)       | 7              | 7  | 8  | 12 | 7  | 9  | 5  | 8  | 2  | 15 | 13      | 9  | 6       | 10 | 10 | 6  | 8  | 5  | 11 | 5  | 11 | 11 | 14:8:0  |
| TB374 (8)       | 2              | 8  | 7  | 7  | 9  | 7  | 7  | 12 | 6  | 19 | 11      | 12 | 4       | 7  | 8  | 9  | 10 | 10 | 10 | 3  | 6  | 18 | 15:7:0  |
| TB083 (10)      | 6              | 4  | 10 | 11 | 12 | 6  | 12 | 16 | 5  | 11 | 13      | 9  | 10      | 8  | 11 | 7  | 6  | 10 | 11 | 6  | 10 | 31 | 10:11:1 |
| TB107 (11)      | 7              | 5  | 13 | 10 | 8  | 9  | 6  | 12 | 9  | 15 | 17      | 15 | 10      | 12 | 11 | 11 | 11 | 16 | 12 | 8  | 14 | 28 | 7:14:1  |
| TB016 (12)      | 9              | 8  | 13 | 14 | 10 | 12 | 11 | 12 | 11 | 13 | 15      | 14 | 6       | 12 | 13 | 18 | 6  | 9  | 11 | 10 | 11 | 30 | 5:16:1  |
| TB113 (12)      | 9              | 13 | 15 | 18 | 9  | 11 | 19 | 11 | 18 | 26 | 16      | 11 | 12      | 7  | 6  | 7  | 8  | 13 | 13 | 8  | 15 | 27 | 7:13:2  |
| TB634 (15)      | 9              | 16 | 18 | 20 | 19 | 20 | 14 | 20 | 22 | 30 | 14      | 17 | 13      | 13 | 11 | 15 | 12 | 13 | 14 | 15 | 15 | 28 | 1:17:4  |
| TB193 (18)      | 10             | 14 | 18 | 21 | 24 | 18 | 15 | 19 | 22 | 32 | 20      | 23 | 11      | 16 | 15 | 16 | 14 | 19 | 15 | 19 | 21 | 33 | 0:14:8  |
| TB036 (19)      | 15             | 14 | 19 | 22 | 21 | 17 | 19 | 20 | 21 | 29 | 21      | 23 | 14      | 13 | 14 | 15 | 9  | 15 | 20 | 15 | 23 | 24 | 1:13:8  |
| TB112 (20)      | 21             | 19 | 15 | 29 | 14 | 28 | 21 | 18 | 33 | 38 | 15      | 18 | 25      | 20 | 20 | 18 | 13 | 16 | 17 | 14 | 28 | 27 | 0:11:11 |
| TB250 (21)      | 6              | 21 | 26 | 24 | 26 | 22 | 21 | 23 | 26 | 33 | 21      | 26 | 8       | 19 | 21 | 20 | 25 | 19 | 19 | 16 | 18 | 42 | 2:6:14  |
| TB286 (26)      | 14             | 20 | 23 | 29 | 29 | 26 | 25 | 26 | 31 | 38 | 22      | 31 | 23      | 13 | 28 | 25 | 29 | 26 | 25 | 84 | 23 | 38 | 0:2:20  |
| TB192 (27)      | 18             | 15 | 23 | 28 | 28 | 40 | 21 | 41 | 27 | 39 | 38      | 32 | 19      | 25 | 22 | 23 | 25 | 28 | 28 | 18 | 30 | 44 | 0:4:18  |
| TB082 (29)      | 15             | 25 | 28 | 27 | 27 | 20 | 35 | 32 | 27 | 31 | 32      | 36 | 22      | 27 | 23 | 29 | 21 | 35 | 32 | 31 | 41 | 51 | 0:2:20  |
| TB033 (31)      | 19             | 18 | 21 | 30 | 30 | 29 | 34 | 32 | 34 | 37 | 34      | 39 | 31      | 32 | 30 | 31 | 33 | 31 | 26 | 30 | 40 | 42 | 0:2:20  |
| TB090 (33)      | 23             | 28 | 31 | 36 | 37 | 34 | 33 | 38 | 29 | 50 | 41      | 40 | 31      | 24 | 22 | 32 | 26 | 25 | 34 | 27 | 37 | 49 | 0:0:22  |
| TB468 (34)      | 21             | 28 | 32 | 35 | 37 | 46 | 31 | 30 | 53 | 51 | 38      | 43 | 33      | 43 | 43 | 26 | 30 | 31 | 33 | 33 | 37 | 43 | 0:0:22  |
| TB022 (34)      | 22             | 30 | 36 | 32 | 34 | 31 | 32 | 36 | 35 | 37 | 43      | 40 | 23      | 30 | 35 | 24 | 38 | 31 | 34 | 30 | 49 | 51 | 0:0:22  |
| TB105 (37)      | 31             | 33 | 40 | 48 | 41 | 37 | 38 | 44 | 43 | 47 | 38      | 39 | 28      | 37 | 27 | 36 | 39 | 34 | 32 | 35 | 32 | 46 | 0:0:22  |
| TB067 (41)      | 30             | 27 | 43 | 42 | 45 | 37 | 40 | 44 | 37 | 46 | 41      | 44 | 45      | 23 | 36 | 29 | 38 | 38 | 36 | 45 | 56 | 42 | 0:0:22  |
| TB203 (42)      | 27             | 42 | 44 | 52 | 52 | 58 | 47 | 49 | 51 | 54 | 39      | 52 | 39      | 33 | 30 | 28 | 40 | 35 | 38 | 41 | 43 | 44 | 0:0:22  |
| TB310 (45)      | 29             | 44 | 47 | 49 | 56 | 44 | 44 | 50 | 55 | 54 | 44      | 50 | 43      | 45 | 37 | 37 | 44 | 44 | 41 | 85 | 51 | 61 | 0:0:22  |
| TB405 (47)      | 36             | 36 | 47 | 37 | 32 | 51 | 30 | 50 | 53 | 55 | 47      | 45 | 32      | 41 | 44 | 47 | 46 | 51 | 35 | 82 | 54 | 59 | 0:0:22  |
| TB381 (50)      | 20             | 50 | 36 | 66 | 63 | 49 | 61 | 50 | 46 | 65 | 51      | 49 | 45      | 54 | 51 | 41 | 33 | 46 | 47 | 85 | 49 | 59 | 0:1:21  |
| TB319 (55)      | 47             | 55 | 54 | 68 | 65 | 60 | 58 | 59 | 55 | 66 | 47      | 54 | 53      | 52 | 49 | 52 | 57 | 56 | 50 | 81 | 70 | 47 | 0:0:22  |
| TB077 (61)      | 47             | 50 | 60 | 58 | 72 | 60 | 67 | 57 | 63 | 70 | 43      | 55 | 65      | 58 | 63 | 61 | 71 | 57 | 67 | 62 | 74 | 69 | 0:0:22  |
| TB633 (62)      | 62             | 54 | 65 | 70 | 65 | 61 | 66 | 71 | 70 | 72 | 58      | 61 | 48      | 58 | 61 | 56 | 57 | 53 | 61 | 84 | 64 | 73 | 0:0:22  |
| TB245 (76)      | 73             | 71 | 85 | 71 | 89 | 82 | 86 | 75 | 87 | 73 | 65      | 77 | 76      | 70 | 76 | 69 | 86 | 66 | 85 | 83 | 90 | 75 | 0:0:22  |
| TB460 (93)      | 95             | 94 | 93 | 98 | 99 | 98 | 99 | 90 | 98 | 91 | 84      | 93 | 88      | 87 | 91 | 91 | 94 | 93 | 91 | 91 | 95 | 86 | 0:0:22  |



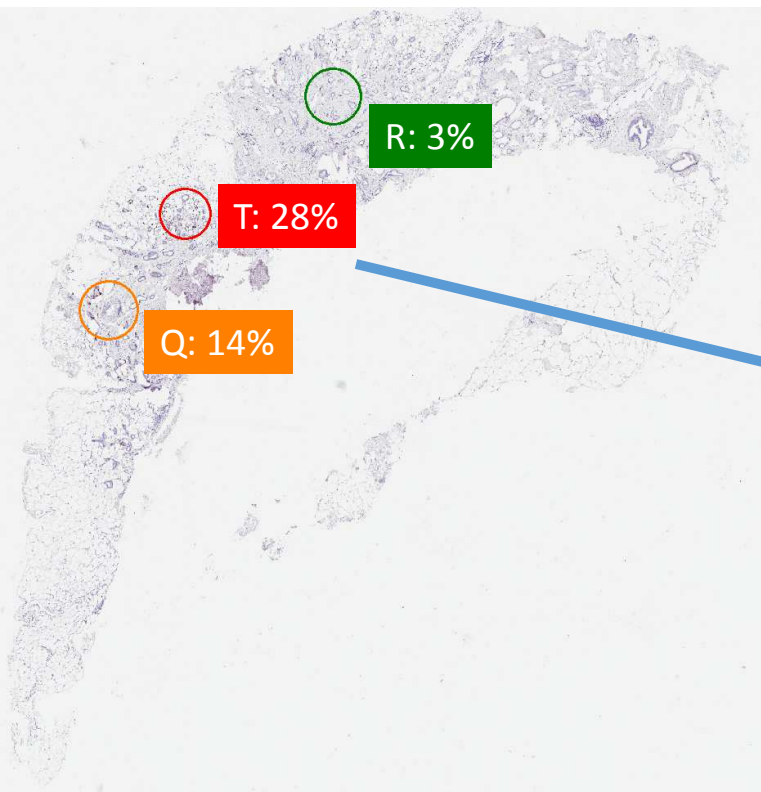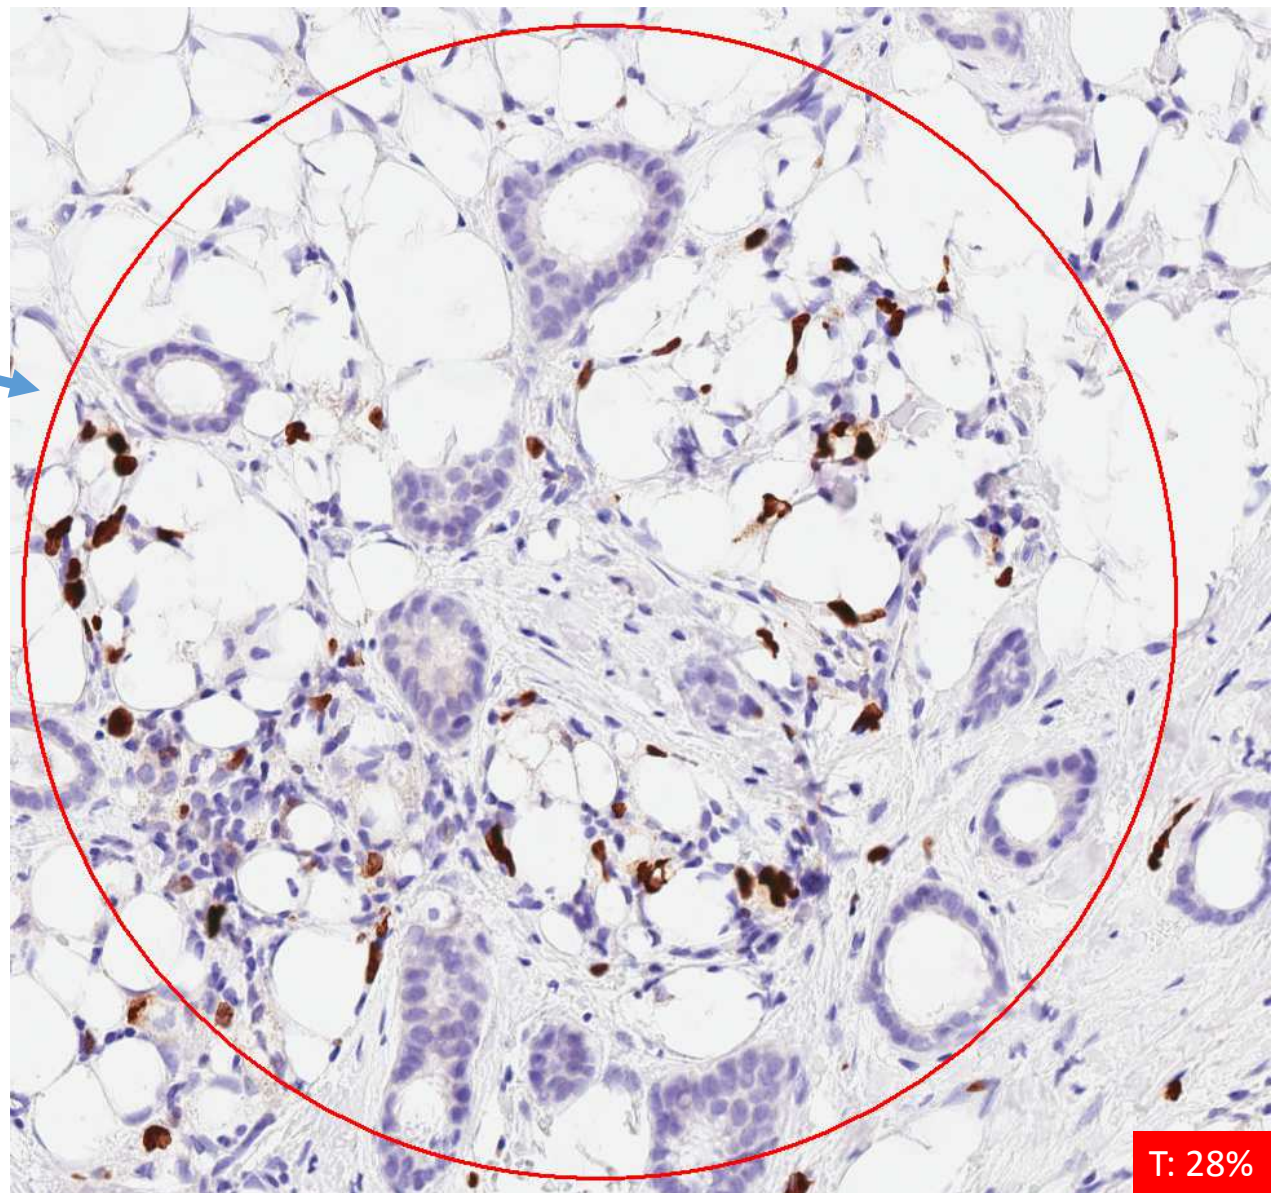

### 3. Positive nuclei localized within a part of the scoring field

- TB193 – group 1 slide
- All labs selected a similar hot-spot field.
- However, score among group 1 ranges from 10% to 32% (mean: 19%)
- One possible cause: positive nuclei localized within a part of the scoring field (*please refer to the next slide*).

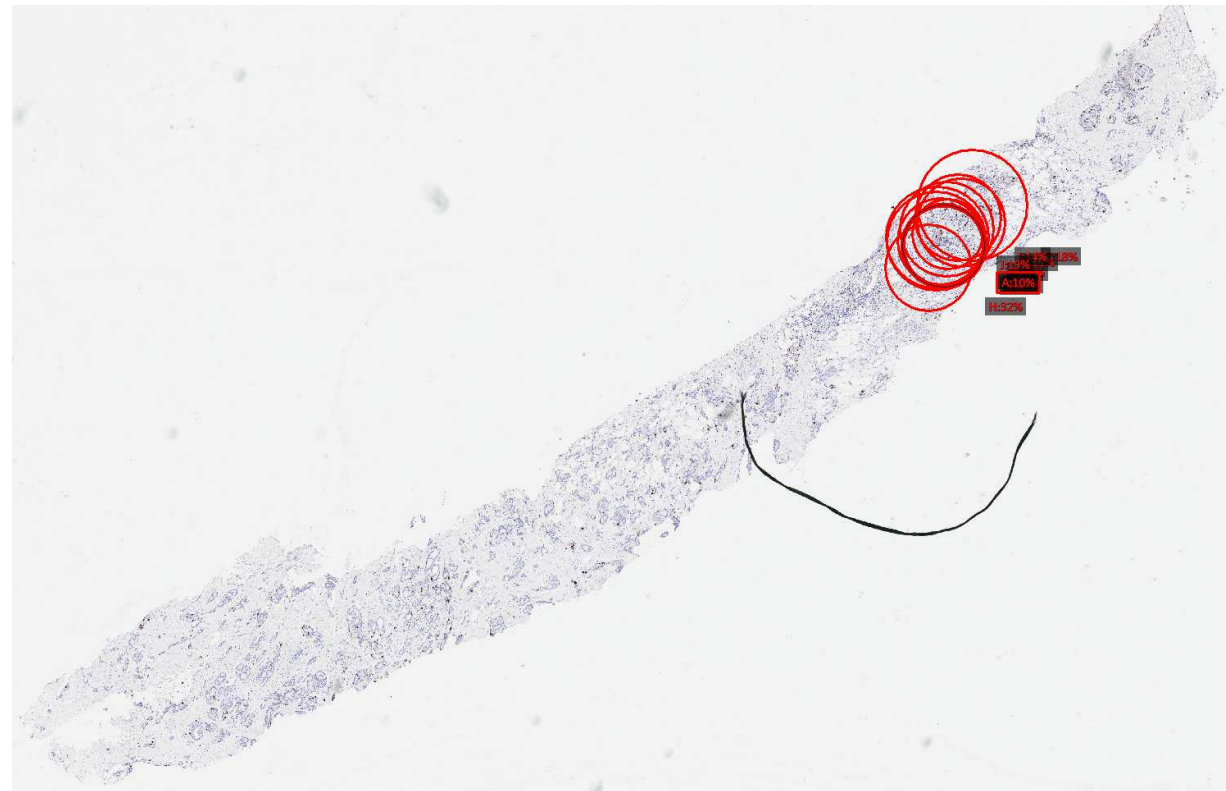



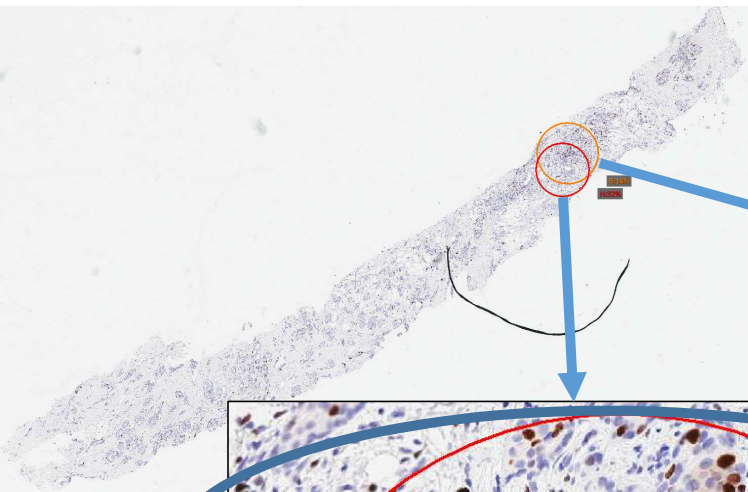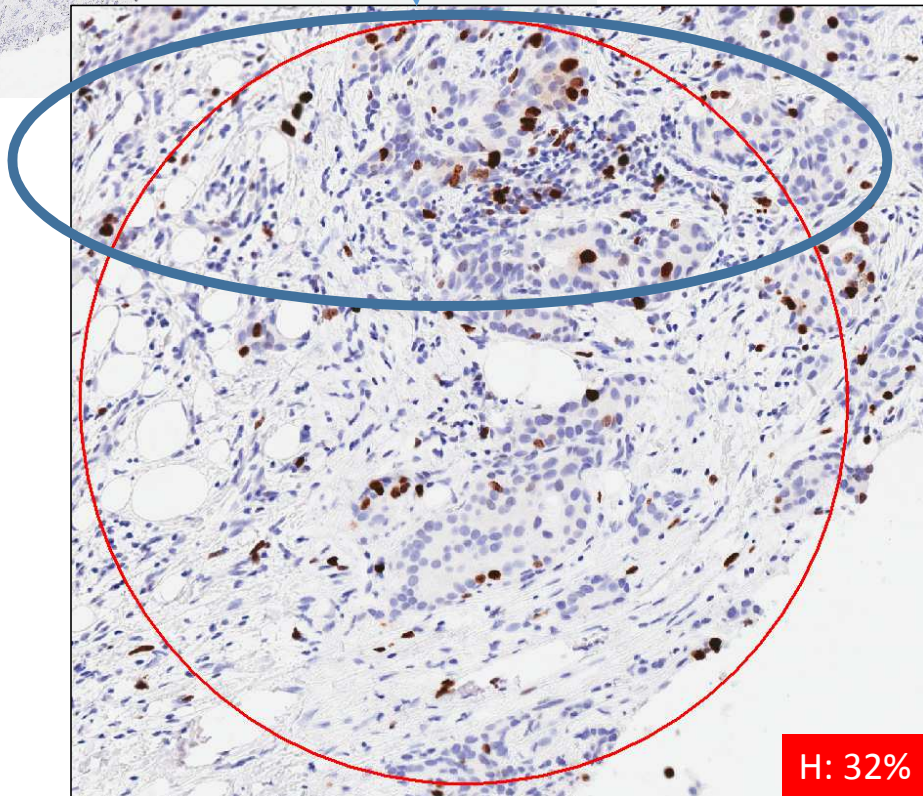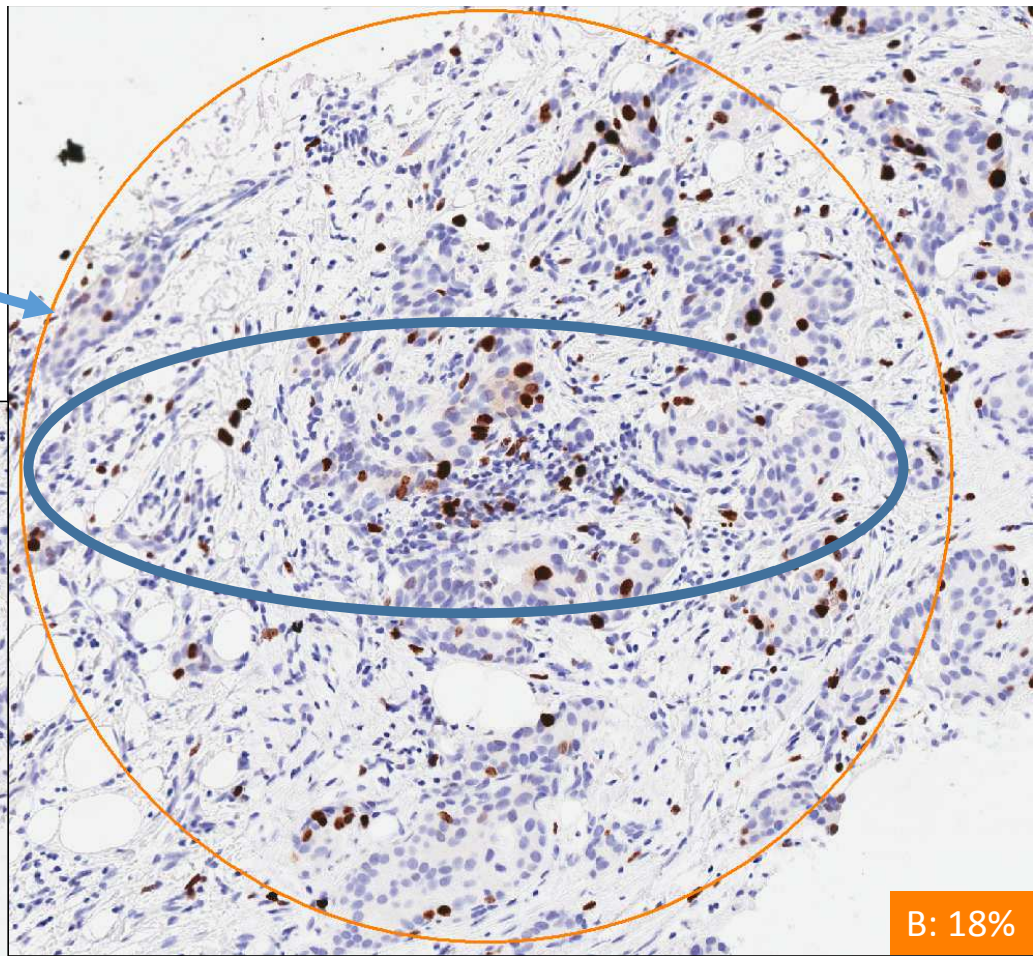

Positive nuclei are more concentrated on the top of the scoring field chosen by lab H compared to the field selected by lab B.

# 4. Labs measuring higher or lower than others tended to do so relatively consistently – labs may need recalibration?

- The following are three cases scored by lab R and T using the global method. They show that the scores given by lab R are fairly consistently lower compared to lab T's scores when they scored the same (or approximately the same) fields.

| (median score) | GROUP 1 |    |    |    |    |    |    |    |    | GROUP 2 |    |    | GROUP 3 |    |    |    |    |    |    |    |    |    |         |
|----------------|---------|----|----|----|----|----|----|----|----|---------|----|----|---------|----|----|----|----|----|----|----|----|----|---------|
| TB374 (4)      | 2       | 2  | 4  | 6  | 6  | 4  | 2  | 3  | 4  | 6       | 4  | 4  | 4       | 4  | 5  | 1  | 2  | 2  | 5  | 4  | 4  | 4  | 22:0:0  |
| TB196 (5)      | 4       | 4  | 2  | 5  | 6  | 3  | 3  | 4  | 6  | 6       | 4  | 8  | 3       | 6  | 8  | 5  | 1  | 2  | 9  | 6  | 17 | 4  | 21:1:0  |
| TB040 (5)      | 3       | 3  | 2  | 5  | 5  | 4  | 2  | 6  | 9  | 15      | 12 | 7  | 4       | 8  | 5  | 3  | 6  | 9  | 5  | 4  | 10 | 9  | 20:2:0  |
| TB083 (7)      | 4       | 5  | 5  | 5  | 10 | 6  | 8  | 7  | 7  | 11      | 11 | 10 | 4       | 7  | 8  | 6  | 8  | 7  | 5  | 5  | 17 | 12 | 18:4:0  |
| TB113 (8)      | 7       | 10 | 6  | 6  | 7  | 13 | 5  | 5  | 9  | 18      | 10 | 7  | 7       | 8  | 5  | 6  | 10 | 6  | 9  | 8  | 14 | 9  | 18:4:0  |
| TB107 (8)      | 4       | 6  | 6  | 7  | 8  | 6  | 10 | 6  | 6  | 12      | 13 | 8  | 7       | 7  | 14 | 11 | 13 | 4  | 14 | 8  | 18 | 12 | 14:8:0  |
| TB112 (9)      | 7       | 12 | 8  | 10 | 7  | 9  | 13 | 8  | 9  | 16      | 12 | 9  | 6       | 8  | 8  | 6  | 12 | 10 | 9  | 14 | 15 | 8  | 14:8:0  |
| TB016 (10)     | 7       | 9  | 10 | 10 | 12 | 11 | 15 | 14 | 10 | 20      | 12 | 13 | 9       | 10 | 9  | 8  | 11 | 7  | 8  | 6  | 18 | 13 | 12:10:0 |
| TB193 (11)     | 8       | 10 | 8  | 11 | 16 | 12 | 18 | 10 | 15 | 26      | 12 | 15 | 9       | 8  | 8  | 11 | 11 | 7  | 11 | 15 | 20 | 15 | 6:14:2  |
| TB634 (13)     | 8       | 12 | 8  | 10 | 13 | 13 | 15 | 12 | 12 | 23      | 9  | 13 | 11      | 12 | 9  | 15 | 17 | 12 | 16 | 28 | 24 | 19 | 4:15:3  |
| TB250 (14)     | 12      | 11 | 10 | 15 | 13 | 13 | 19 | 15 | 15 | 20      | 16 | 10 | 9       | 14 | 14 | 13 | 15 | 12 | 12 | 21 | 17 | 16 | 2:18:2  |
| TB022 (19)     | 14      | 21 | 22 | 18 | 18 | 8  | 24 | 22 | 18 | 25      | 18 | 20 | 15      | 16 | 16 | 18 | 20 | 21 | 22 | 13 | 24 | 30 | 1:12:9  |
| TB036 (19)     | 15      | 16 | 16 | 18 | 23 | 19 | 21 | 20 | 26 | 30      | 24 | 24 | 14      | 12 | 16 | 16 | 21 | 14 | 18 | 19 | 21 | 25 | 0:13:9  |
| TB033 (20)     | 19      | 17 | 20 | 19 | 22 | 21 | 26 | 26 | 22 | 30      | 26 | 28 | 14      | 20 | 10 | 20 | 19 | 20 | 22 | 18 | 29 | 28 | 1:10:11 |
| TB286 (21)     | 15      | 11 | 16 | 18 | 24 | 26 | 22 | 20 | 21 | 24      | 20 | 29 | 15      | 16 | 24 | 20 | 13 | 28 | 19 | 62 | 28 | 28 | 0:10:12 |
| TB192 (21)     | 9       | 19 | 13 | 31 | 25 | 26 | 25 | 31 | 28 | 33      | 28 | 18 | 18      | 17 | 17 | 15 | 18 | 18 | 21 | 37 | 27 | 22 | 1:9:12  |
| TB082 (26)     | 17      | 17 | 16 | 22 | 26 | 23 | 34 | 26 | 26 | 29      | 28 | 34 | 13      | 24 | 22 | 30 | 29 | 27 | 20 | 22 | 34 | 39 | 0:5:17  |
| TB090 (28)     | 14      | 23 | 24 | 24 | 30 | 31 | 27 | 25 | 34 | 38      | 36 | 38 | 14      | 16 | 30 | 31 | 32 | 24 | 31 | 27 | 26 | 44 | 0:3:19  |
| TB381 (29)     | 25      | 22 | 26 | 38 | 38 | 42 | 34 | 28 | 38 | 37      | 27 | 24 | 30      | 31 | 22 | 24 | 29 | 20 | 27 | 67 | 30 | 33 | 0:0:22  |
| TB468 (32)     | 25      | 28 | 21 | 41 | 31 | 43 | 32 | 33 | 41 | 47      | 24 | 30 | 20      | 32 | 32 | 32 | 29 | 30 | 25 | 44 | 34 | 36 | 0:1:21  |
| TB405 (33)     | 26      | 25 | 23 | 38 | 36 | 35 | 42 | 31 | 33 | 43      | 38 | 29 | 16      | 22 | 32 | 34 | 30 | 33 | 28 | 64 | 33 | 38 | 0:1:21  |
| TB105 (34)     | 25      | 29 | 26 | 30 | 37 | 31 | 46 | 32 | 43 | 41      | 30 | 38 | 24      | 32 | 34 | 30 | 34 | 43 | 38 | 36 | 48 | 40 | 0:0:22  |
| TB067 (34)     | 30      | 32 | 32 | 34 | 41 | 27 | 34 | 41 | 33 | 42      | 32 | 38 | 29      | 27 | 32 | 30 | 36 | 49 | 26 | 38 | 40 | 55 | 0:0:22  |
| TB203 (36)     | 29      | 40 | 27 | 51 | 37 | 46 | 36 | 52 | 45 | 45      | 31 | 43 | 29      | 22 | 21 | 32 | 31 | 36 | 30 | 64 | 44 | 36 | 0:0:22  |
| TB077 (39)     | 30      | 37 | 48 | 52 | 38 | 33 | 40 | 50 | 51 | 31      | 38 | 43 | 33      | 38 | 33 | 43 | 39 | 52 | 32 | 62 | 52 | 68 | 0:0:22  |
| TB310 (41)     | 32      | 41 | 34 | 48 | 55 | 42 | 42 | 46 | 46 | 53      | 36 | 37 | 29      | 28 | 36 | 38 | 41 | 42 | 39 | 85 | 42 | 46 | 0:0:22  |
| TB633 (49)     | 41      | 44 | 44 | 54 | 52 | 45 | 30 | 42 | 58 | 58      | 51 | 57 | 39      | 43 | 47 | 43 | 60 | 46 | 53 | 90 | 50 | 58 | 0:0:22  |
| TB319 (51)     | 41      | 45 | 49 | 66 | 60 | 59 | 56 | 49 | 58 | 61      | 42 | 50 | 51      | 48 | 44 | 48 | 56 | 52 | 48 | 82 | 48 | 67 | 0:0:22  |
| TB245 (70)     | 68      | 70 | 70 | 78 | 68 | 70 | 67 | 76 | 73 | 75      | 58 | 61 | 77      | 66 | 54 | 61 | 76 | 78 | 50 | 83 | 66 | 77 | 0:0:22  |
| TB460 (88)     | 89      | 84 | 90 | 74 | 98 | 97 | 94 | 88 | 92 | 77      | 82 | 90 | 87      | 89 | 86 | 84 | 84 | 79 | 85 | 94 | 79 | 95 | 0:0:22  |
|                | A       | I  | F  | B  | G  | D  | J  | C  | E  | H       | L  | K  | R       | P  | O  | V  | S  | U  | Q  | N  | T  | M  |         |



# Example case 1 of 3: TB192

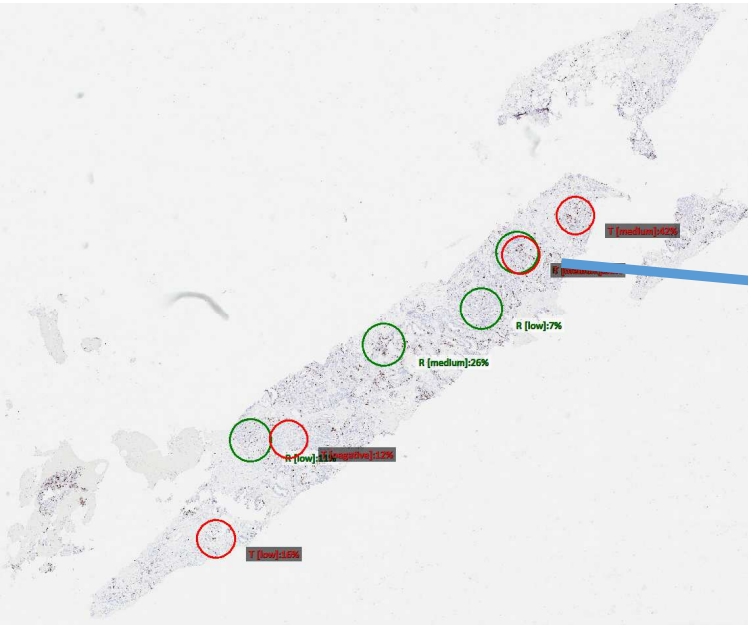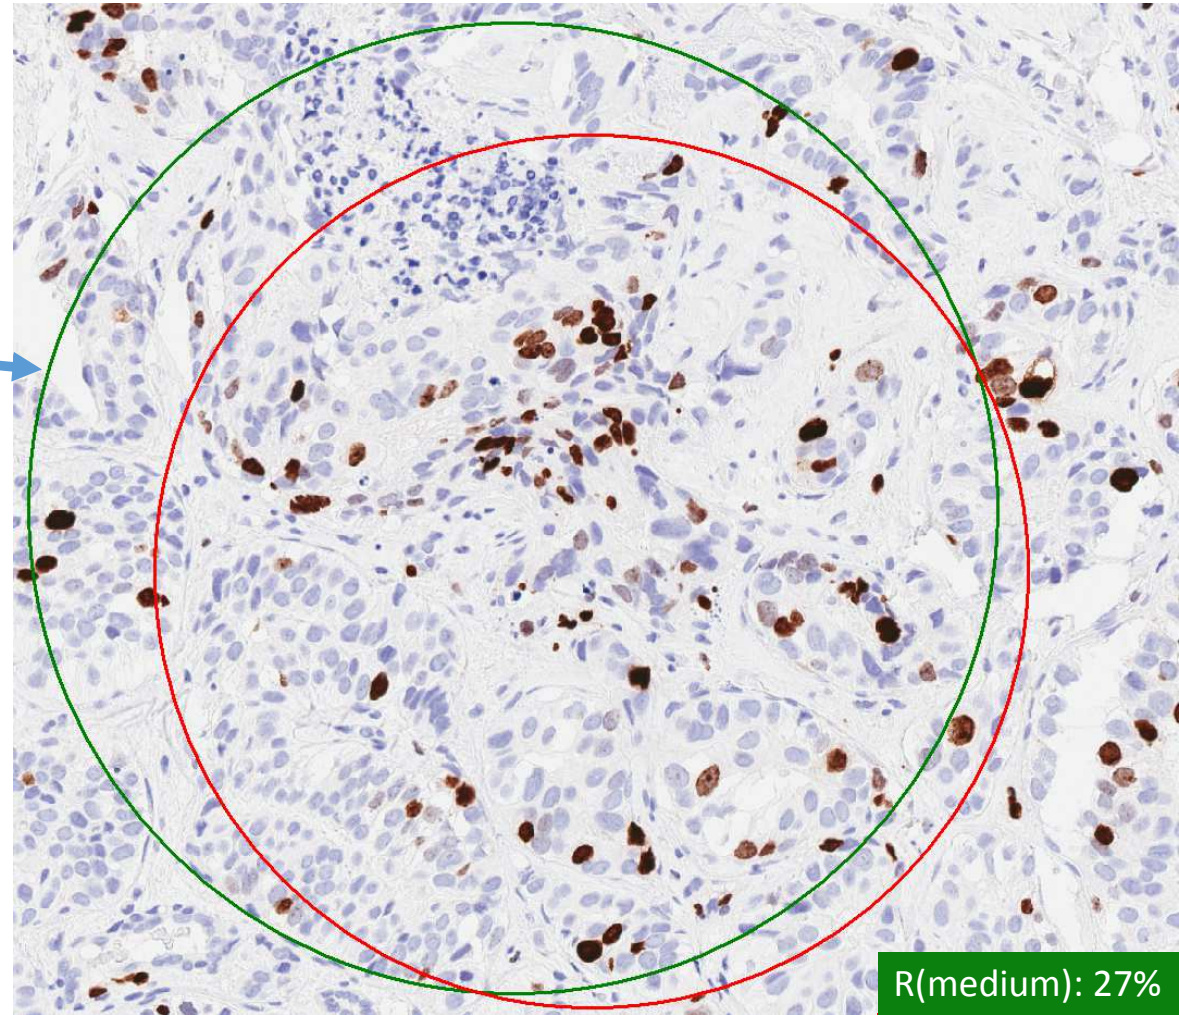

R(medium): 27%

T(medium): 38%



# Example case 2 of 3: TB193

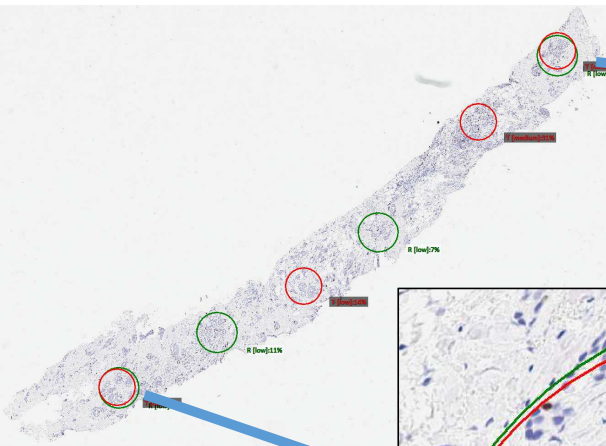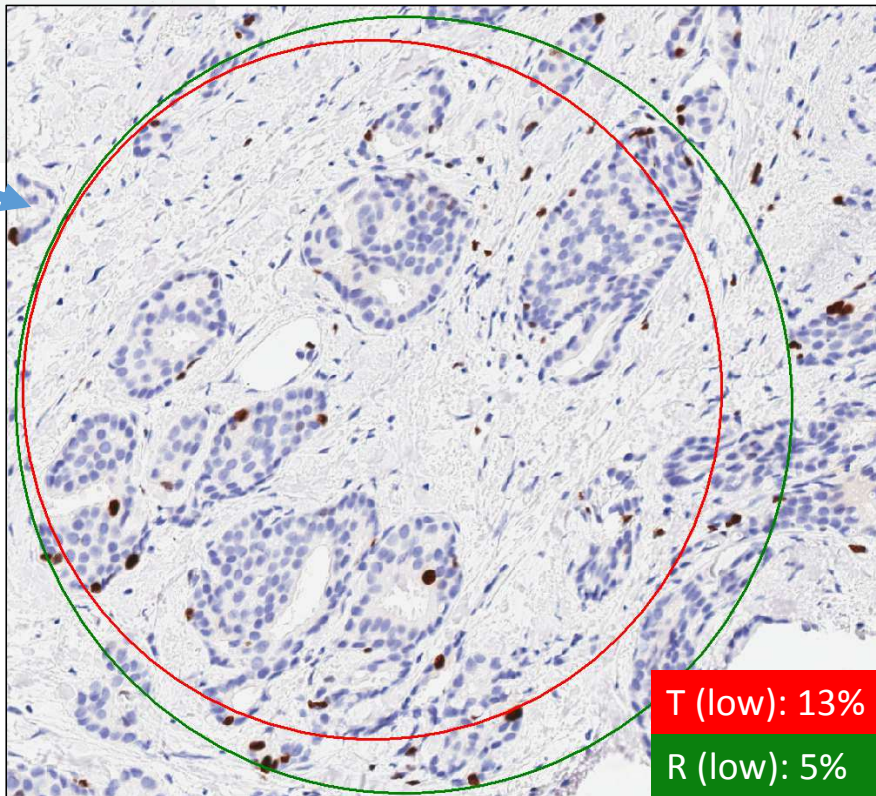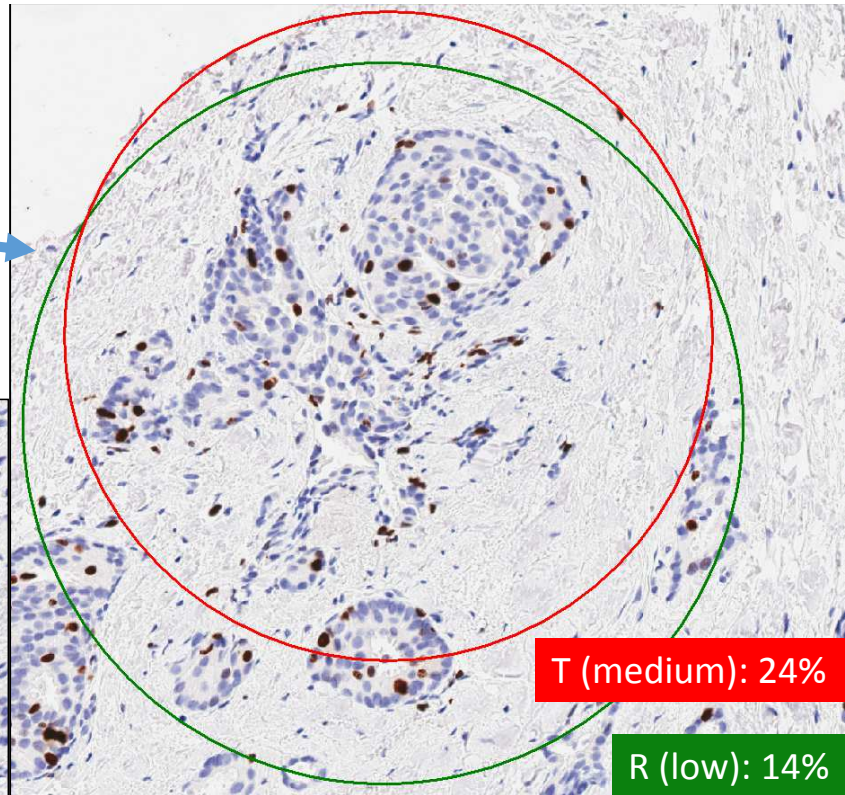



# Example case 3 of 3: TB374

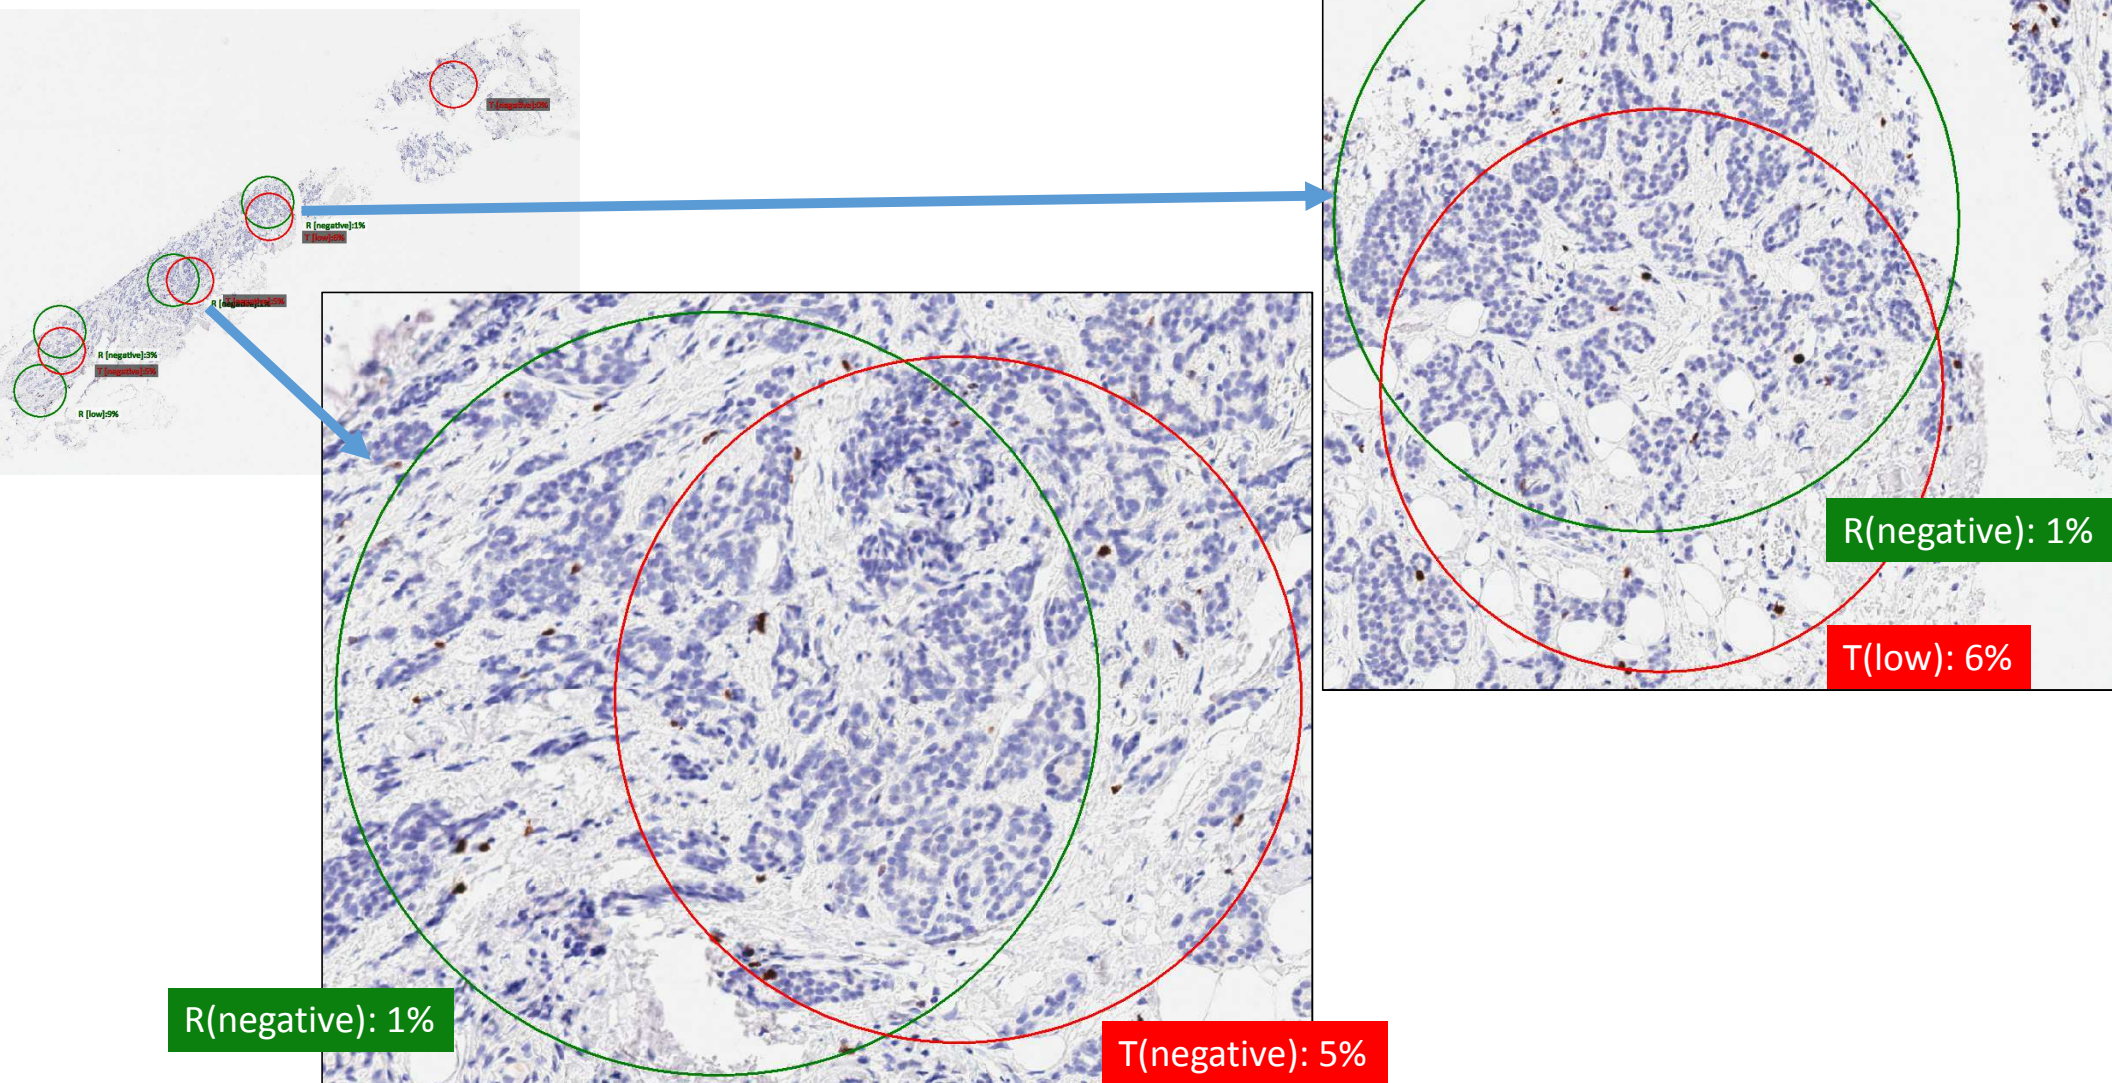



## 5. Hot-spot score discrepancy seems to be driven (partly) by field selection

- The following two cases are example of hot-spot scores being fairly consistent if similar hot-spot fields were selected.

Example 1 of 2:  
consistent hot-spot  
scores on similar hot-  
spot fields.  
TB016 (group 3)

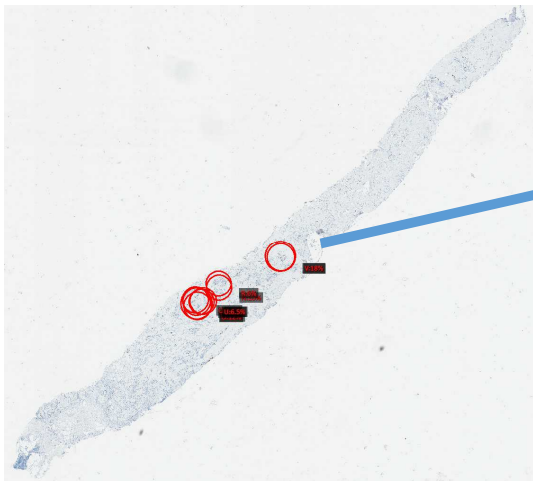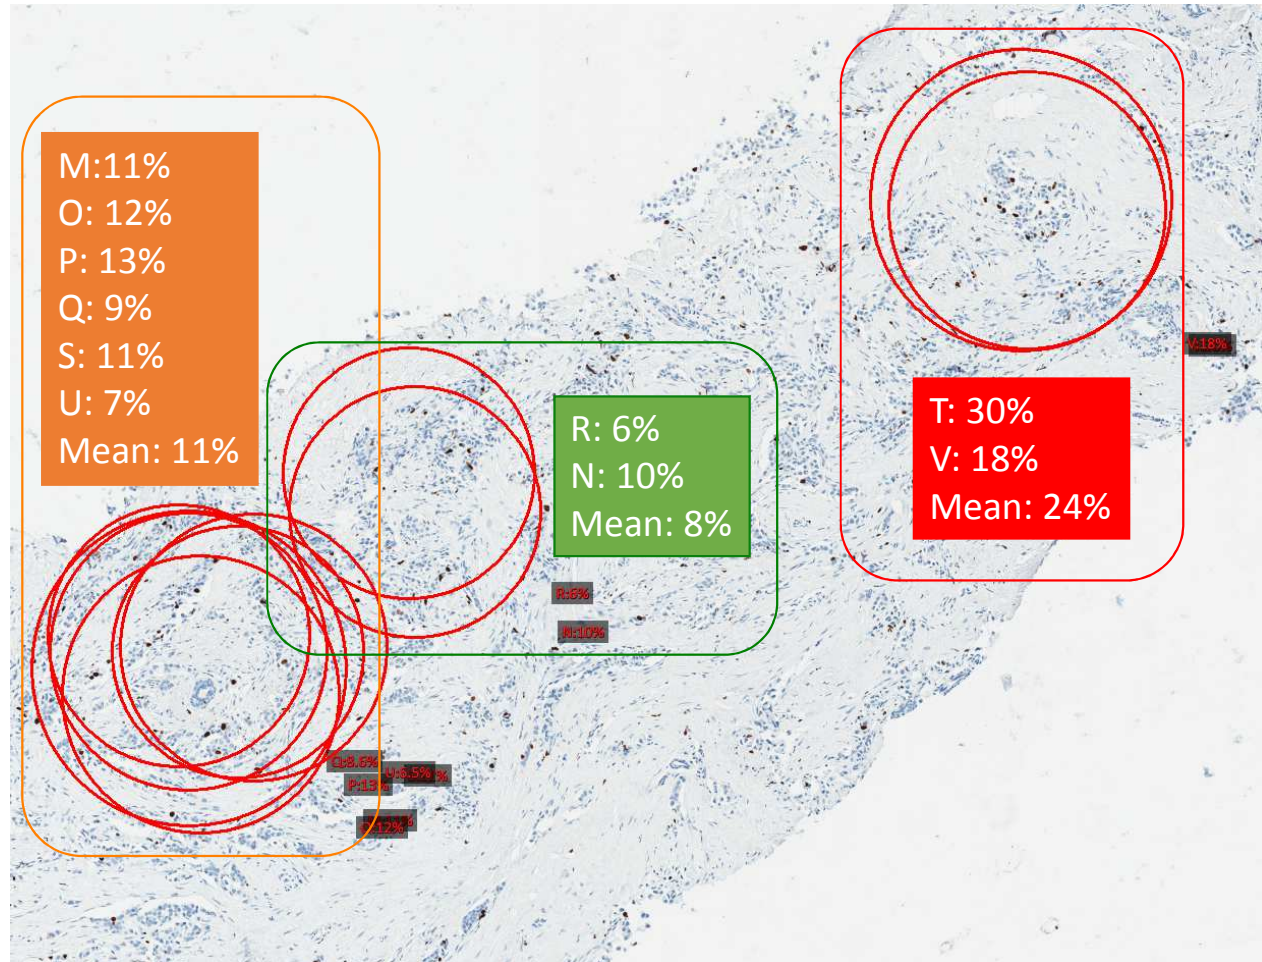

# Example 2 of 2: consistent hot-spot scores on similar hot-spot fields

## TB250 (group 1&3)

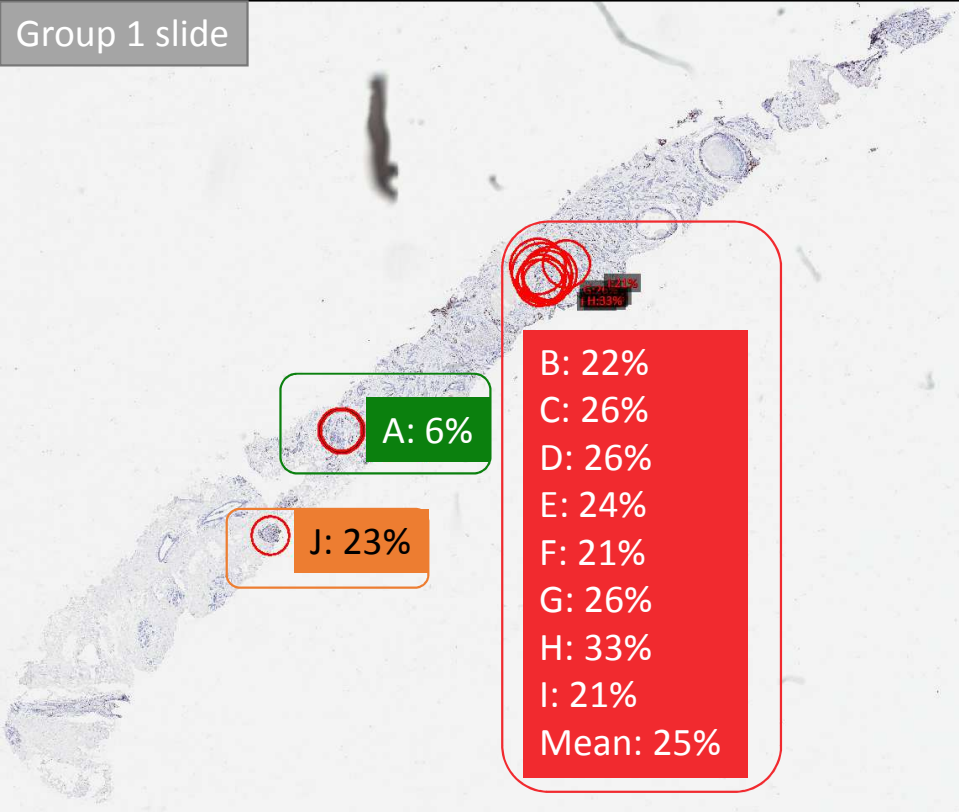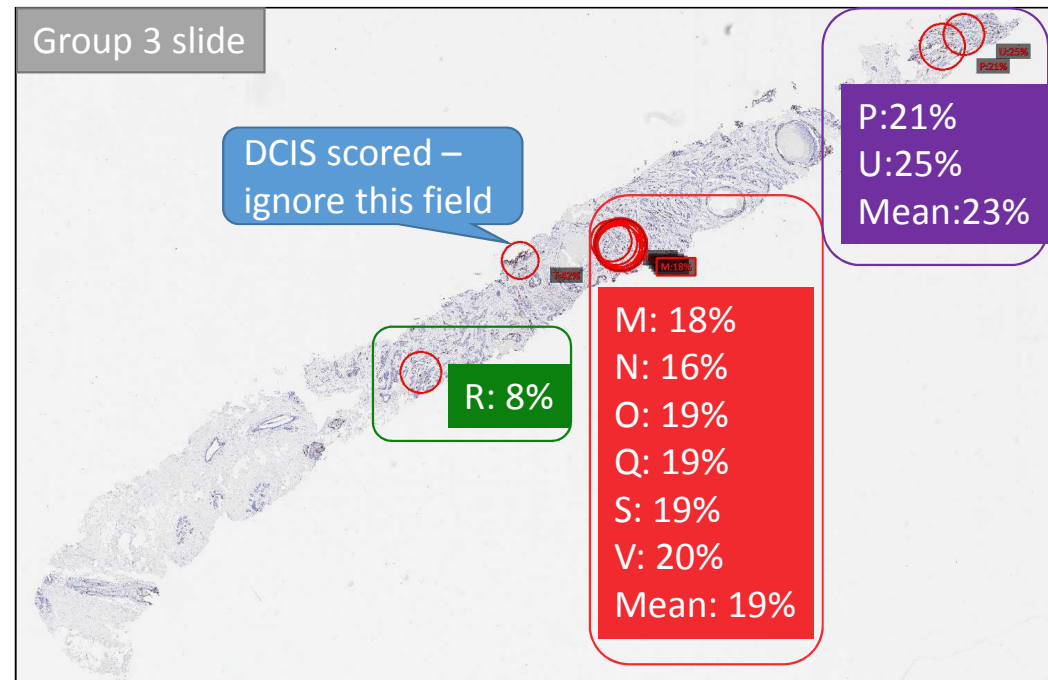

Both lab A (group 1) and R (group 3) scored considerably lower compared to other labs. Apparently, they've selected similar hot-spot fields (albeit in different sections).
